# Supplementary material for: Single-nucleus RNA-seq identifies Huntington disease astrocyte states
Source: PubMed Central journal article supplement (PMC7029580; doi:10.1186/s40478-020-0880-6), 2020-02-18

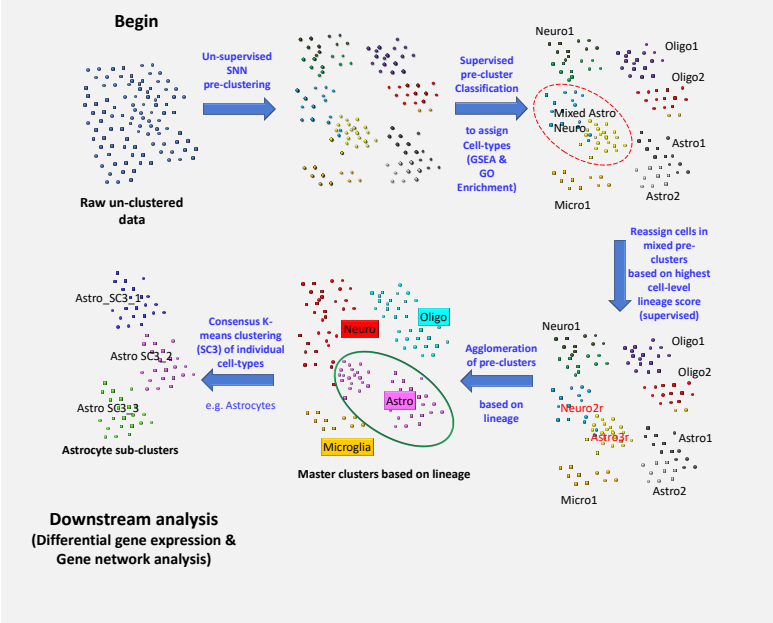

Supplement: 40478_2020_880_MOESM1_ESM.pdf [file 40478_2020_880_MOESM1_ESM.pdf]
